# Supplementary material
Source: publisher figshare collection journal article supplement (https://gsapubs.figshare.com/ndownloader/files/22758500)
Supplement: Supplementary file 1 [file 22758500]

## DATA REPOSITORY ITEM

### I. Analytical Methods

Magmatic anhydrites have been analyzed in thin sections and amphibole and pyroxene grain mounts in epoxy plugs, polished in absence of water with diamond paste. Chemical composition of magmatic amphibole and anhydrite were determined using Cameca SX100 electron microprobe at Oregon State University, using 30 nA current, 15 kV accelerating potential, and a beam size of 1 to 5  $\mu\text{m}$ .

Laser-ablation ICP-MS analysis of anhydrite were performed in the W.M. Keck Collaboratory for Plasma Mass Spectrometry at Oregon State University using a VG ExCell quadrupole ICP-MS and NewWave DUV 193 nm ArF Excimer laser system, with He used as the sweep gas. General analyses conditions were similar to those in Kent et al. (2004) and analyses used laser spot sizes between 50-80  $\mu\text{m}$  in diameter and pulse rates of  $\sim 5$  Hz.  $^{43}\text{Ca}$  was used as the internal standard isotope and analyses were quantified with reference to analysis of NIST 612 and 610 standard glasses under similar ablation conditions. Measurement of standard glasses suggest an accuracy better than 10% for these measurements. Phosphorous and silica have been monitored to trace apatite, host mineral or melt presence within the ablated volume, and where necessary the contribution from these phases was subtracted from the measured composition.

## II. Summary of Analytical Data on Anhydrite

Table DR1: Average compositional data for anhydrite

|                                       | YANACocha: Inclusions in |          |       | Pinatubo  | Pinatubo | Julcani | High Temperature Hydrothermal |             |           |       |
|---------------------------------------|--------------------------|----------|-------|-----------|----------|---------|-------------------------------|-------------|-----------|-------|
|                                       | high-Al A                | low-Al A | Cpx   | inclusion | pheno    | pheno   | Butte                         | El Salvador | Ajo       | DLppm |
| Electron microprobe data (oxide wt %) |                          |          |       |           |          |         |                               |             |           |       |
| SO <sub>3</sub>                       | 58.92                    | 58.27    | 58.72 | 58.26     | 58.48    | 58.30   | 58.38                         | 59.24       | 58.14     | 320   |
| P <sub>2</sub> O <sub>5</sub>         | 0.13                     | 0.12     | 0.19  | 0.26      | 0.11     | 0.19    | 0.10                          | 0.08        | 0.10      | 113   |
| CaO                                   | 39.21                    | 41.61    | 40.89 | 41.18     | 41.04    | 39.63   | 41.80                         | 40.28       | 41.56     | 231   |
| FeO                                   | 0.48                     | 0.47     | 0.23  | 0.59      | 0.04     | 0.02    | 0.01                          | BDL         | BDL       | 361   |
| SiO <sub>2</sub>                      | 0.06                     | 0.19     | 0.06  | 0.10      | 0.00     | 0.01    | 0.26                          | 0.03        | 0.07      | 129   |
| SrO                                   | 0.71                     | 0.45     | 0.36  | 0.28      | 0.22     | 1.75    | 0.14                          | 0.22        | 0.11      | 380   |
| LA-ICP-MS analyses (ppm)              |                          |          |       |           |          |         |                               |             |           |       |
| Sr                                    | 3763(232)                |          |       | 1895*     | 33634    | (4415)  | 1184*                         | 2593*       | 826*(36)* |       |
| Y                                     | 23 (2)                   |          |       | 25        | 3        | (0.3)   | 115                           | 37          | 74 (0.9)  |       |
| Ba                                    | 38 (12)                  |          |       | 43        | 14839    | (878)   | 1                             | 2           | 5 (1.5)   |       |
| La                                    | 73 (5)                   |          |       | 213       | 42       | (2.4)   | 78                            | 18          | 251(6.5)  |       |
| Ce                                    | 167 (10)                 |          |       | 356       | 61       | (3.2)   | 151                           | 39          | 487 (10)  |       |
| Pr                                    | 24 (2)                   |          |       | 38        | 6        | (0.4)   | 18                            | 6           | 58 (1.1)  |       |
| Nd                                    | 101 (9)                  |          |       | 134       | 23       | (1.1)   | 69                            | 28          | 211 (3.6) |       |
| Sm                                    | 16 (2.4)                 |          |       | 16        | 3        | (0.3)   | 16                            | 7           | 31 (0.7)  |       |
| Eu                                    | 4 (0.7)                  |          |       | 4         | 1        | (0.1)   | 5                             | 3           | 3 (0.1)   |       |
| Gd                                    | 8 (2.5)                  |          |       | 10        | 2        | (0.3)   | 17                            | 8           | 22 (0.6)  |       |
| Dy                                    | 3 (1.5)                  |          |       | 5         | 0.5      | (0.1)   | 20                            | 7           | 12 (0.3)  |       |
| Er                                    | 1 (0.5)                  |          |       | 2         | 0.2      | (0.1)   | 12                            | 3           | 5 (0.1)   |       |
| Yb                                    | 1 (0.7)                  |          |       | 1         | BDL      | BDL     | 12                            | 3           | 3 (0.1)   |       |

(-): 1 sigma error, \* 1sigma error similar for Pinatubo phenocryst, Butte, El Salvador, & Ajo.

Magmatic anhydrites from Yanacocha (Peru), Pinatubo (Philippines), and Bulolo dacite dike at Julcani (Peru) and high temperature hydrothermal anhydrite from Butte (Montana, USA), El Salvador (Chile), Ajo (Arizona, USA). high-Al A = aluminum-rich amphibole (wormy); low-Al A = aluminum-poor amphibole; BDL = below detection limit; DLppm = detection limit (ppm).

Additional rare earth element data are plotted in Figure 3B, normalized to primitive mantle values of Sun and McDonough (1989).

## III. Samples and Preparation

Anhydrite-bearing samples were prepared in two manners. Most amphibole, pyroxene, and anhydrite crystals were mounted in epoxy plugs and polished with diamond grit in a water-free environment with alcohol as lubricant to prevent dissolution of water-soluble anhydrite. The Julcani samples contained phenocrystic anhydrite and were provided by Don Noble as mounted in standard polished thin sections.

#### IV. Additional References

- Arculus, R.J., Johnson, R.W., Chappell, B.W., McKee, C.O., and Sakai, H., 1983, Ophiolite-contaminated andesites, trachybasalts, and cognate inclusions of Mount Lamington, Papua New Guinea: Anhydrite-amphibole-bearing lavas and the 1951 cumulodome: *Journal of Volcanology and Geothermal Research*, v. 18, p. 215-247.
- Drexler, J.W., and Munoz, J.L., 1985, Highly oxidized, pyrrhotite-anhydrite-bearing silicic magmas from the Julcani Ag-Cu-Bi-Pb-Au-W District, Peru: physicochemical conditions of a productive magma, *in* Canadian Institute of Mining Conference on Granite-related Mineral Deposits, Extended Abstracts, p. 87-100.
- Fournelle, J., Carmody, R., and Daag, A.S., 1996, Anhydrite-bearing pumices from the June 15, 1991, eruption of Mount Pinatubo: Geochemistry, mineralogy, and petrology, *in* Newhall, C.G. and Punongbayan, R.S., eds., *Fire and Mud: Eruptions and lahars of the Mount Pinatubo*, Philippines: Philippine Institute of Volcanology and Seismology, University of Washington Press, p. 845-863.
- Gerlach, T.M., Westrich, H.R., and Symonds, R.B., 1996, Preeruption vapor in magma of the climatic Mount Pinatubo eruption: source of the giant stratospheric sulfur dioxide cloud, *in* Newhall, C.G. and Punongbayan, R.S., eds., *Fire and Mud: Eruptions and lahars of the Mount Pinatubo*, Philippines: Philippine Institute of Volcanology and Seismology, University of Washington Press, p. 415-433.
- Hedenquist, J.W., and Lowenstern, J.B., 1994, The role of magmas in the formation of hydrothermal ore deposits: *Nature*, v. 370, p. 519–526, doi: 10.1038/370519a0.
- Kent, A. J. R., Stolper, E. M., Francis, D., Woodhead, J., Frei, R., Eiler, J., 2004, Mantle heterogeneity during the formation of the North Atlantic Igneous Province; constraints from trace element and Sr-Nd-Os-O isotope systematics of Baffin Island picrites: *Geochemistry, Geophysics, Geosystems - G<sup>3</sup>*, Vol. 5, Issue 11, 26 p.
- Longo, A.A., and Teal, L., 2005, A summary of the volcanic stratigraphy and the geochronology of magmatism and hydrothermal activity in the Yanacocha Gold District, northern Peru, *in* Rhoden, H.N., Steininger, R.C. and Vikre, P.G., eds., *Geological Society of Nevada Symposium, 2005, Window on the World*, Reno, Nevada, p. 797-808.
- Luhr, J.F., Carmichael, I.S.E., and Varekamp, J.C., 1984, The 1982 eruptions of El Chichon volcano, Chiapas, Mexico: Mineralogy and petrology of the anhydrite-bearing pumices: *Journal of Volcanology and Geothermal Research*, v. 23, p. 69–108, doi: 10.1016/0377-0273(84)90057-X.
- Parat, F., and Holtz, F., 2005, Sulfur partition coefficient between apatite and rhyolite: the role of bulk S content: *Contributions to Mineralogy and Petrology*, v. 150, p. 643-651.
- Peng, G., Luhr, J. F., and McGee, J. J., 1997, Factors controlling sulfur concentrations in volcanic apatite: *American Mineralogist*, v. 82, p. 1210-1224.

- Scaillet, B. and Evans, B.W., 1999, The 15 June 1991 eruption of Mount Pinatubo. I. Phase equilibria and pre-eruption  $P$ - $T$ - $fO_2$ - $fH_2O$  conditions of the dacitic magma: *Journal of Petrology*, v. 40, p. 381-411.
- Sun, S.S. and McDonough, W.F., 1989, Chemical and isotopic systematic of oceanic basalts: implications for mantle composition and processes, *in* Saunders, A.D. and Norry, M.J. (eds): *Magmatism in ocean basins*, Geological Society of London Special Publication, v. 42, p. 313-345.
- Wallace, P., and Carmichael, I.S.E., 1992, Sulfur in basaltic magmas: *Geochimica et Cosmochimica Acta*, v. 56, p. 1863-1874.

## V. Mass balance estimate for hydrothermal sulfur at Yanacocha

The geologic maps and cross-sections of Longo (2005) were used to estimate the volume of hydrothermally altered rocks at Yanacocha ( $\sim 2.5 \text{ km}^3$ ). These volume estimates are approximate, and likely have errors of  $\pm 50\%$ . An unknown, but significant amount of altered rock has been removed by erosion (probably  $< 20\%$  of the total volume above), so our estimates are minima. The volume percent pyrite within these rocks is based on estimates of representative rock samples from these zones, which lie peripheral to the main ore zones. They are also approximate, and likely have errors of  $\pm 50\%$ .

The volume of strongly altered, ore bearing zones that can be estimated from the average ore reserve and production grades (0.5 to 1 g/tonne) and the total resource of  $\sim 50$  M ounces ( $\sim 1,800$  tonnes) of gold contained in  $\sim 3$  G tonnes oxide ores with abundant alunite and pyrite. In addition,  $\sim 1$  G tonnes of sulfide-bearing Cu-Au are present beneath the Au-bearing oxide ores (L. Teal, personal commun., 2006). Our estimates are minima, because the main orebodies around the main Yanacocha pit have been eroded and glaciated, and the upper sulfur-rich part of the hydrothermal system is missing. The presence of abundant pyrophyllite ( $> 250^\circ\text{C}$  stability) in the ores suggests that boiling solutions were at  $> 10$  bar hydrostatic pressure, i.e. at  $> 100$  m depth.

Table DR2: Mass Balance Estimate for Yanacocha Hydrothermal Sulfur

| Hydrothermal Zone                                        | Mass     | Sulfide               | Sulfide | S     | Sulfate | Sulfate | S     | Sulfur   |
|----------------------------------------------------------|----------|-----------------------|---------|-------|---------|---------|-------|----------|
|                                                          | G tonnes | Minerals              | wt. %   | wt. % | Mineral | wt. %   | wt. % | M tonnes |
| conservative & minimum estimate                          |          |                       |         |       |         |         |       |          |
| Au ore bodies                                            | 3        | Py, Cv, En (oxidized) | 5       | 2.67  | alunite | 5       | 0.77  | 103      |
| Peripheral propylitic & intermediate argillic alteration | 6        | Py                    | 2       | 1.07  | tr      | 0       | 0     | 64       |
| Deep Cu-Au sulfide ores                                  | 1        | Py, Cv, En            | 2       | 1.07  | alunite | 0.5     | 0.27  | 13       |
|                                                          |          |                       |         |       |         |         | sum   | 181      |

abbreviations: Py = pyrite; Cv = covellite; En = enargite
